# Supplementary material
Source: PubMed Central journal article supplement (PMC5910334)
Supplement: 11606_2017_4245_MOESM1_ESM.pdf [file 11606_2017_4245_MOESM1_ESM.pdf]

**Appendix 1. Characteristics of participating clinics**

| Clinic ID | Location                                         | Municipality population | Clinic size (mean number of monthly patient visits) |
|-----------|--------------------------------------------------|-------------------------|-----------------------------------------------------|
| 1         | Iwate Town, Iwate Prefecture                     | 13,692                  | 1278                                                |
| 2         | Fukushima City, Fukushima Prefecture             | 294,247                 | 2304                                                |
| 3         | Maebashi City, Gunma Prefecture                  | 336,154                 | 900                                                 |
| 4         | Fujimino City, Saitama Prefecture                | 110,970                 | 1422                                                |
| 5         | Kita Ward, Tokyo                                 | 341,076                 | 792                                                 |
| 6         | Arakawa Ward, Tokyo                              | 212,264                 | 1602                                                |
| 7         | Arakawa Ward, Tokyo                              | 212,264                 | 756                                                 |
| 8         | Koganei City, Tokyo                              | 121,396                 | 756                                                 |
| 9         | Takatsu Ward, Kawasaki City, Kanagawa Prefecture | 228,141                 | 1800                                                |
| 10        | Saiwai Ward, Kawasaki City, Kanagawa Prefecture  | 160,890                 | 1260                                                |
| 11        | Minato Ward, Nagoya City, Aichi Prefecture       | 146,745                 | 900                                                 |
| 12        | Izumo City, Shimane Prefecture                   | 171,938                 | 468                                                 |
| 13        | Iyo City, Ehime Prefecture                       | 36,827                  | 720                                                 |

## Appendix 2. Item contents of the Japanese version of Primary Care Assessment Tool

| <b>First contact</b>                                                                                                                 | Strongly agree | Somewhat agree | Not sure | Somewhat disagree | Strongly disagree |
|--------------------------------------------------------------------------------------------------------------------------------------|----------------|----------------|----------|-------------------|-------------------|
| 1. When your Primary Care Practice is closed, is there a phone number you can call when you get sick?                                | 5              | 4              | 3        | 2                 | 1                 |
| 2. When your Primary Care Practice is closed on Saturday and Sunday and you get sick, would someone from there see you the same day? | 5              | 4              | 3        | 2                 | 1                 |
| 3. When your Primary Care Practice is closed and you get sick during the night, would someone from there see you that night?         | 5              | 4              | 3        | 2                 | 1                 |
| <b>Longitudinality</b>                                                                                                               | Strongly agree | Somewhat agree | Not sure | Somewhat disagree | Strongly disagree |
| 1. Does your Primary Care Physician (PCP) give you enough time to talk about your worries or problems?                               | 5              | 4              | 3        | 2                 | 1                 |
| 2. Do you feel comfortable telling your PCP about your worries or problems?                                                          | 5              | 4              | 3        | 2                 | 1                 |
| 3. Does your PCP know you very well as a person, rather than as someone with a medical problem?                                      | 5              | 4              | 3        | 2                 | 1                 |
| 4. Does your PCP know what problems are most important to you?                                                                       | 5              | 4              | 3        | 2                 | 1                 |
| 5. Does your PCP know your complete medical history?                                                                                 | 5              | 4              | 3        | 2                 | 1                 |
| <b>Coordination</b>                                                                                                                  | Strongly agree | Somewhat agree | Not sure | Somewhat disagree | Strongly disagree |
| 1. Have you ever had a visit to any kind of specialist or special service?                                                           |                | Yes            |          | No/Not sure       |                   |
| 2. Did your PCP suggest you go to the specialist or special service?                                                                 | 5              | 4              | 3        | 2                 | 1                 |
| 3. Did your PCP discuss with you different places you could have gone to get help with that problem?                                 | 5              | 4              | 3        | 2                 | 1                 |
| 4. Did your PCP or someone working with your PCP help you make the appointment for that visit?                                       | 5              | 4              | 3        | 2                 | 1                 |
| 5. Did your PCP write down any information for the specialist about the reason for the visit?                                        | 5              | 4              | 3        | 2                 | 1                 |
| 6. Does your PCP know what the results of the visit were?                                                                            | 5              | 4              | 3        | 2                 | 1                 |
| <b>Comprehensiveness (services available)</b>                                                                                        | Strongly agree | Somewhat agree | Not sure | Somewhat disagree | Strongly disagree |
| For each one, please indicate whether it is available at your PCP's office.                                                          |                |                |          |                   |                   |
| 1. Counseling for mental health problems                                                                                             | 5              | 4              | 3        | 2                 | 1                 |
| 2. Changes in mental or physical abilities that are normal with getting older                                                        | 5              | 4              | 3        | 2                 | 1                 |
| 3. Counseling related to dementia                                                                                                    | 5              | 4              | 3        | 2                 | 1                 |
| 4. Counseling related to abuse                                                                                                       | 5              | 4              | 3        | 2                 | 1                 |
| 5. Counseling related to personal preferences about end of life issues                                                               | 5              | 4              | 3        | 2                 | 1                 |
| <b>Comprehensiveness (services provided)</b>                                                                                         | Strongly agree | Somewhat agree | Not sure | Somewhat disagree | Strongly disagree |
| In visits to your PCP, are any of the following subjects discussed with you?                                                         |                |                |          |                   |                   |

|                                                                                                       |                       |                       |                 |                          |                          |
|-------------------------------------------------------------------------------------------------------|-----------------------|-----------------------|-----------------|--------------------------|--------------------------|
| 1. Advice about appropriate exercise for you                                                          | 5                     | 4                     | 3               | 2                        | 1                        |
| 2. Advice about regular bowel movements                                                               | 5                     | 4                     | 3               | 2                        | 1                        |
| 3. Advice about over-the-counter medications                                                          | 5                     | 4                     | 3               | 2                        | 1                        |
| 4. Advice about medical information in the media: on TV, in the newspaper, etc.                       | 5                     | 4                     | 3               | 2                        | 1                        |
| 5. Advice about a healthy balance of work and rest                                                    | 5                     | 4                     | 3               | 2                        | 1                        |
| <b>Community orientation</b>                                                                          | <b>Strongly agree</b> | <b>Somewhat agree</b> | <b>Not sure</b> | <b>Somewhat disagree</b> | <b>Strongly disagree</b> |
| 1. Does anyone at your PCP's office ever make home visits?                                            | 5                     | 4                     | 3               | 2                        | 1                        |
| 2. Does your PCP know about the important health problems of your community?                          | 5                     | 4                     | 3               | 2                        | 1                        |
| 3. Does your PCP get opinions and ideas from people that will help to provide better health care?     | 5                     | 4                     | 3               | 2                        | 1                        |
| 4. Does your PCP investigate whether the available health care is meeting the needs of the community? | 5                     | 4                     | 3               | 2                        | 1                        |
| 5. Does your PCP investigate the concerns people have about health problems in your community?        | 5                     | 4                     | 3               | 2                        | 1                        |
